# Supplementary material
Source: PubMed Central journal article supplement (PMC7282547)

## Supplementary Figure

There are two k-mean clustering results in this work to find dFNC states in SWC and ASWC methods. Both k-mean runs were configured for  $k = 6$  clusters as in a previous study using this data (Vergara, et al., 2018). The centroids of both k-means were cross-correlated to verify the similarity of the dFNC states. Below is the cross-correlation matrix. The main diagonal confirms that dFNC states in fact match between SWC and ASWC. Indexes are ordered to match the dFNC state numbers of the figures in the slides that follow.

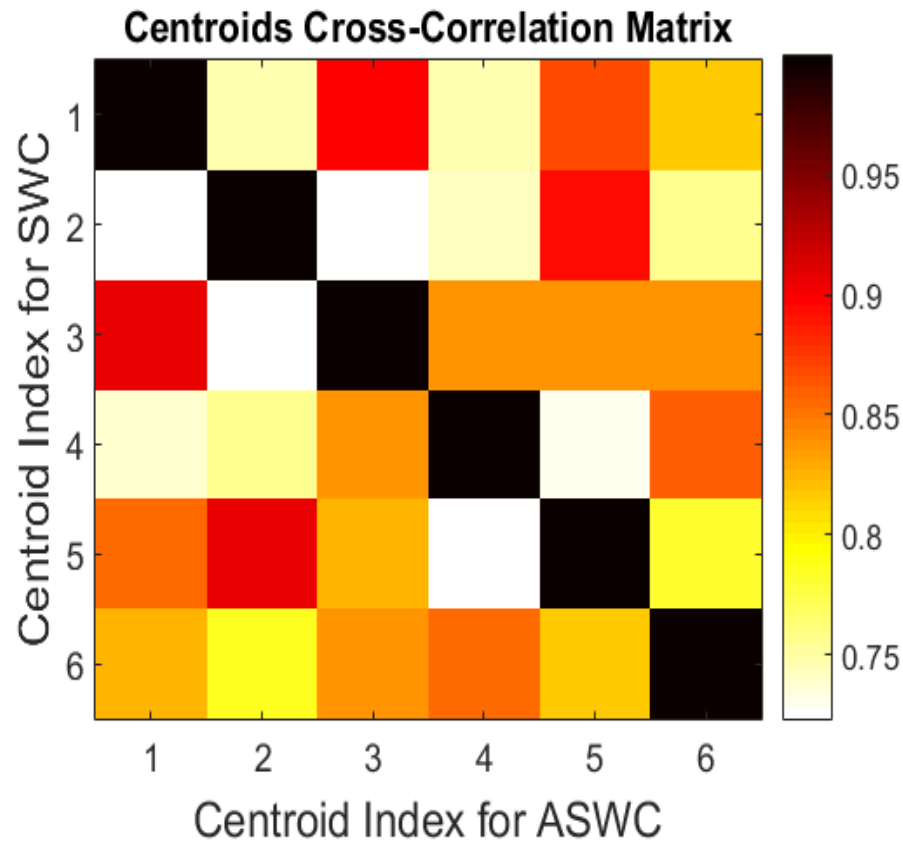

Supplement: NIHMS1594471-supplement-sup_2__fig.pdf [file NIHMS1594471-supplement-sup_2__fig.pdf]
